# Supplementary material for: Rare CIDEC coding variants enriched in age-related macular degeneration patients with small low-luminance deficit cause lipid droplet and fat storage defects
Source: PubMed Central journal article supplement (PMC10118094; doi:10.1371/journal.pone.0280484), 2023-04-20

A

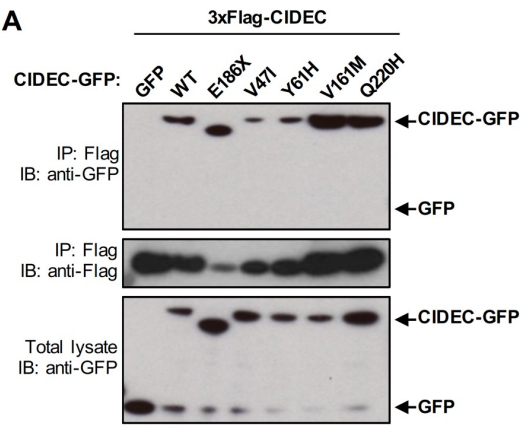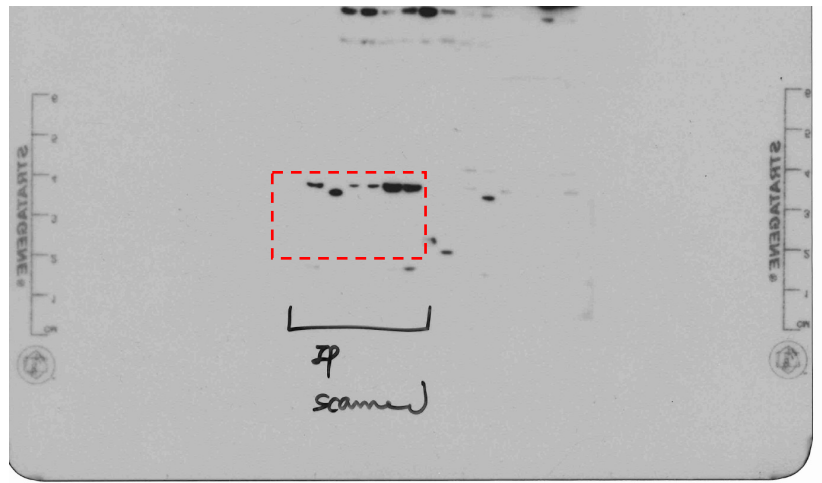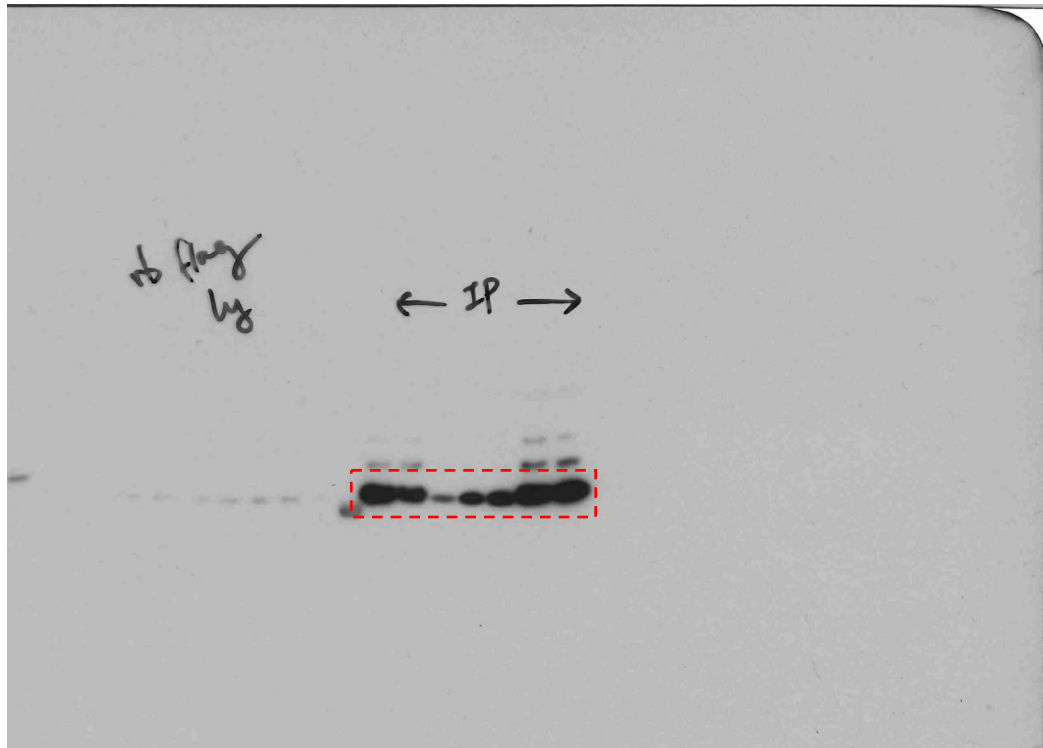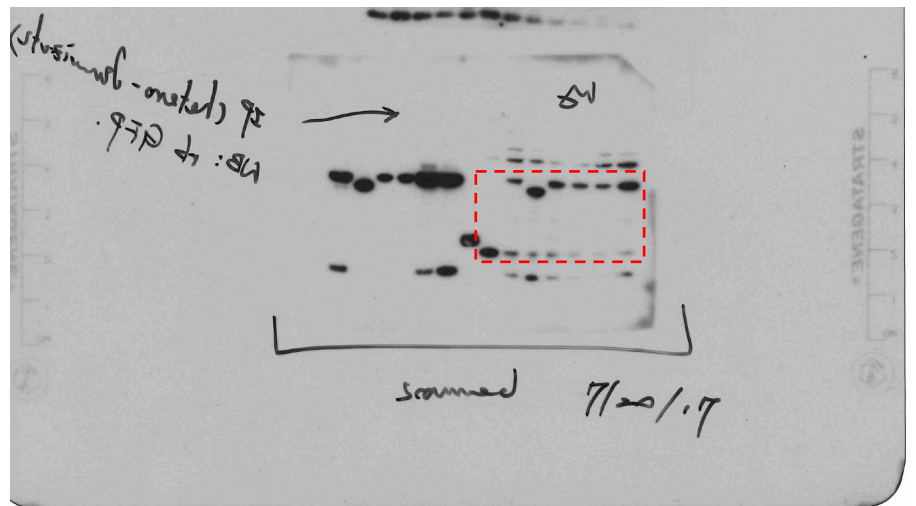

**B**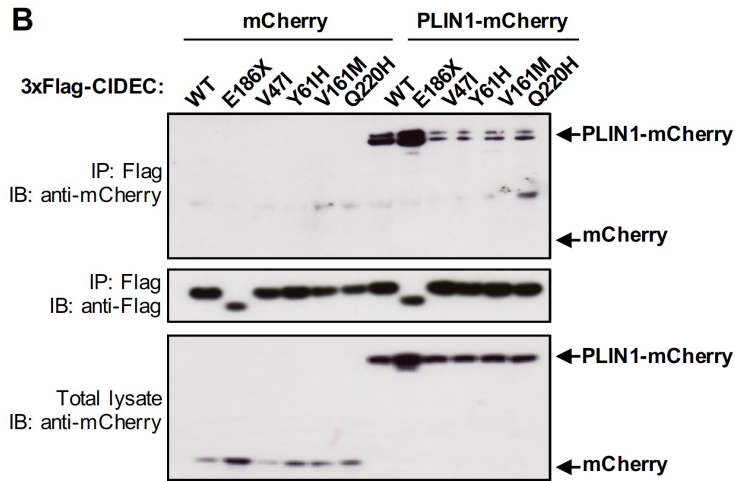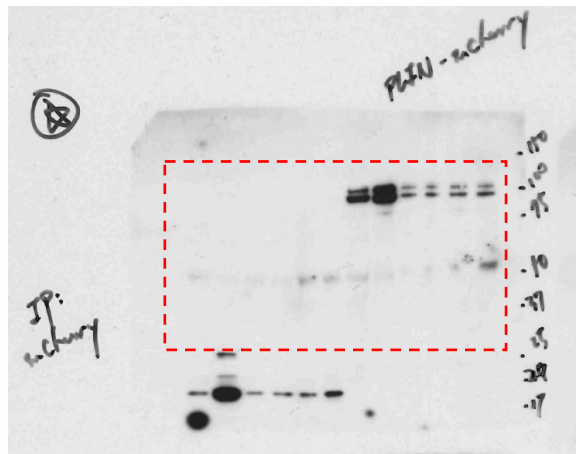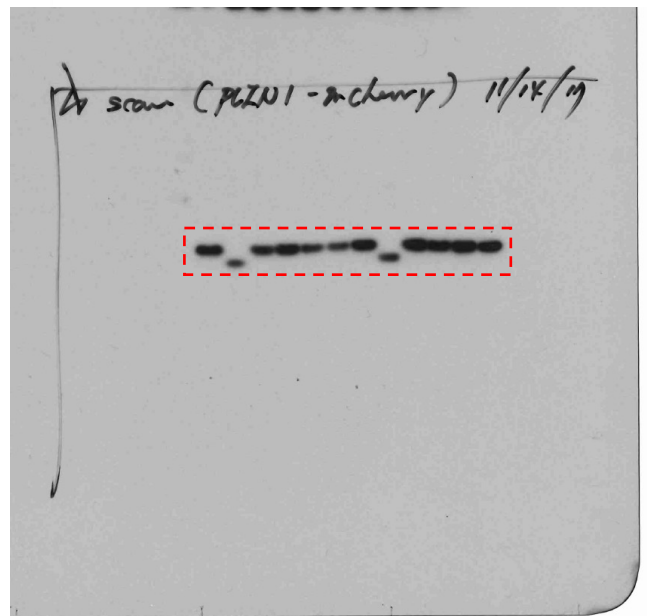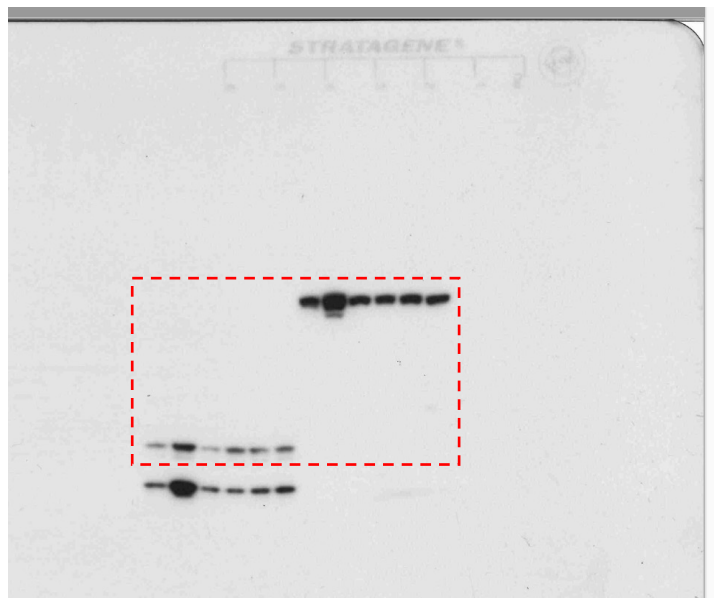

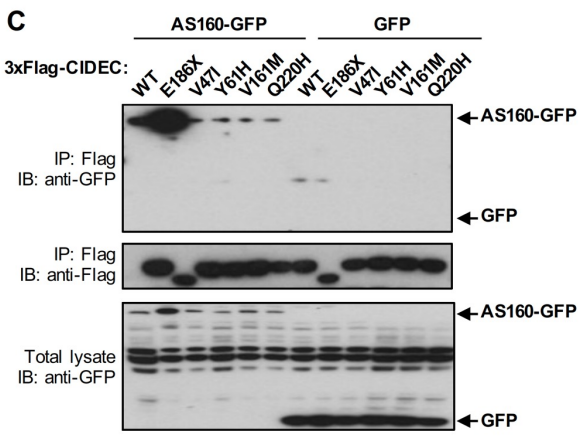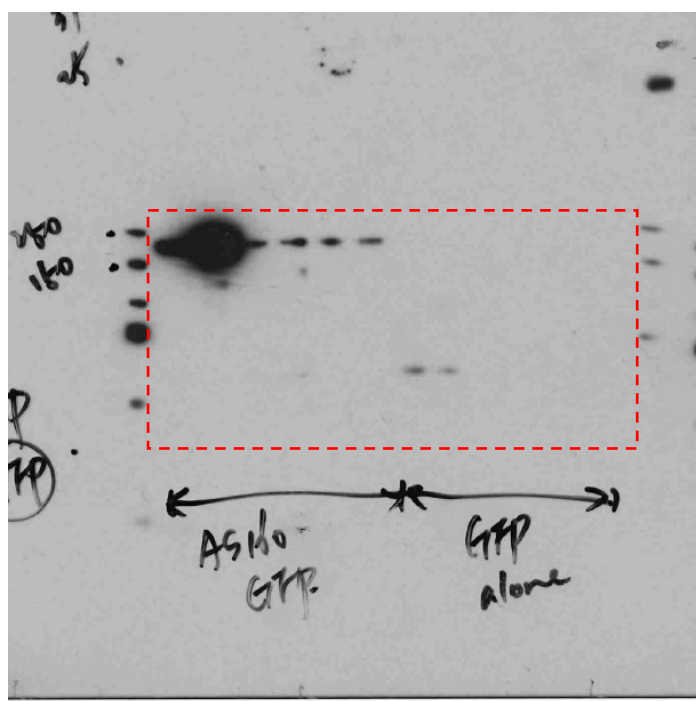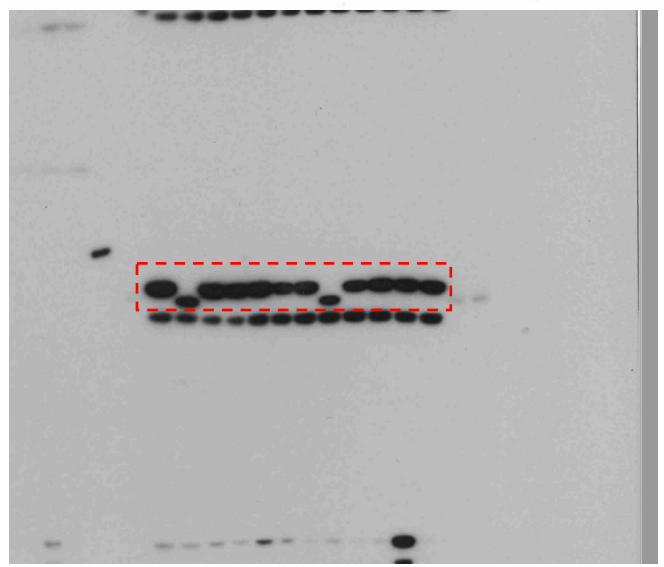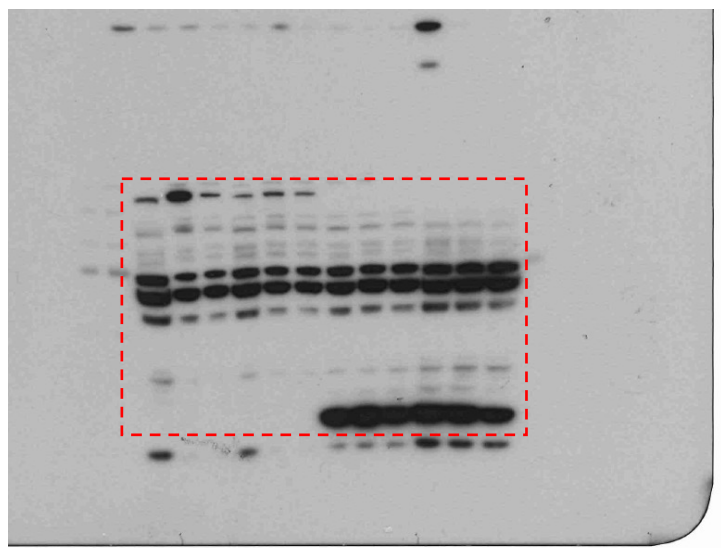

**D**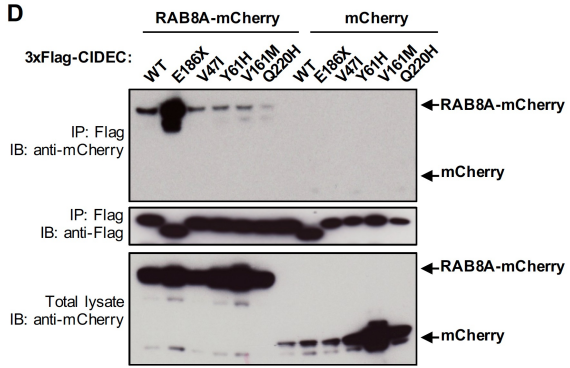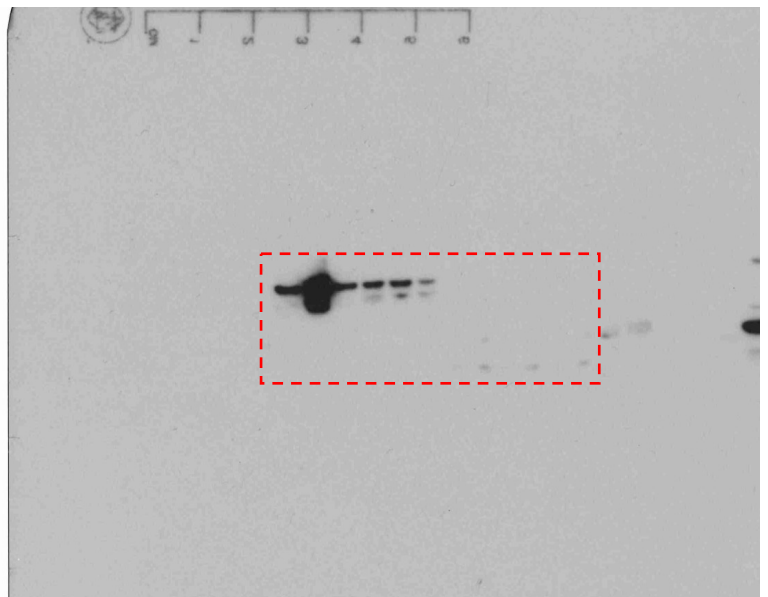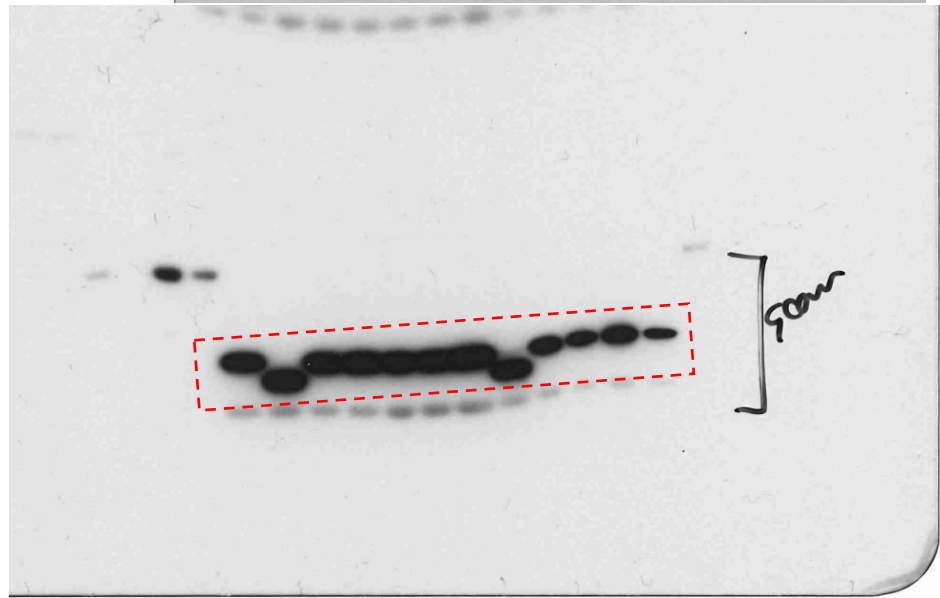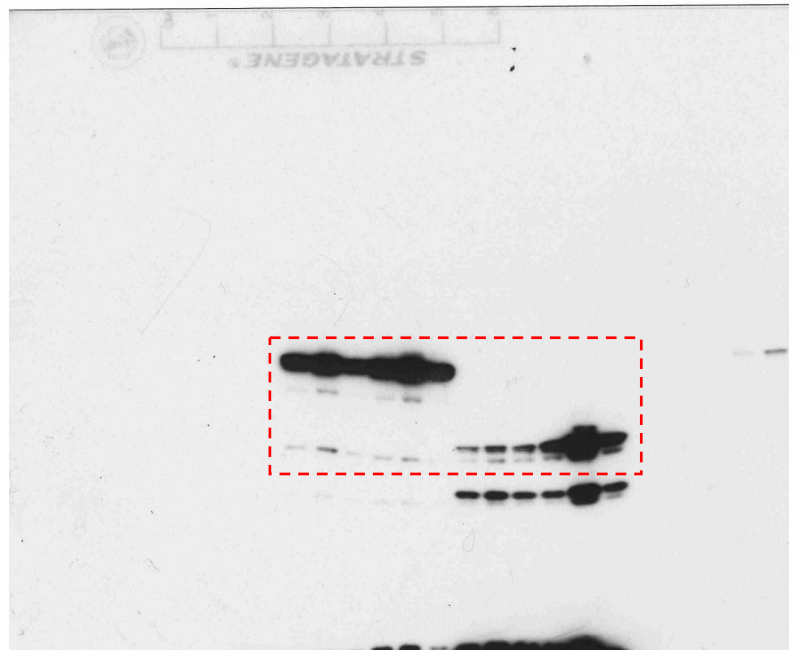

Supplement: pone.0280484.s002.pdf [file pone.0280484.s002.pdf]
