# Supplementary material for: Rare CIDEC coding variants enriched in age-related macular degeneration patients with small low-luminance deficit cause lipid droplet and fat storage defects
Source: PubMed Central journal article supplement (PMC10118094; doi:10.1371/journal.pone.0280484), 2023-04-20
Supplement: pone.0280484.s001.pdf [file pone.0280484.s001.pdf]

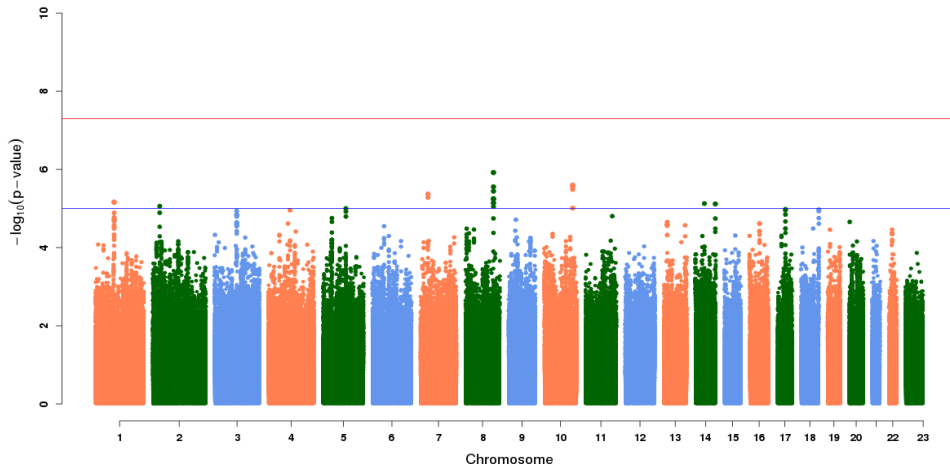

**S1 Fig: Manhattan plot of common variant analysis results contrasting AMD patients in the top and bottom LDD quartiles (Q1 and Q4).**

In adipose tissue, only 0.5% of *CIDEC* transcripts contain exon 4

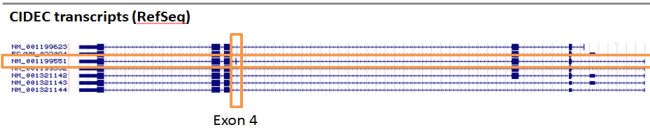

| RefSeq transcript   | Exon 4 | % expression (transcripts per million) |
|---------------------|--------|----------------------------------------|
| NM_001199623        |        | 12.8%                                  |
| NM_022094           |        | 4.5%                                   |
| <b>NM_001199551</b> | ✓      | <b>0.5%</b>                            |
| NM_001199552        |        | 49.7%                                  |
| NM_001321142        |        | 21.1%                                  |
| NM_001321143        |        | 5.0%                                   |
| NM_001321144        |        | 6.4%                                   |

159 adipose tissue donors

Source: GTEx, Salmon Isoform Quantification

**S2 Fig: Summary of *CIDEC* exon expression in adipose tissue.** *CIDEC* exon 4, the location of all rare variants seen in Q4 AMD patients, is expressed in 0.5% of all *CIDEC* transcripts found in adipose tissue in samples from the GTEx project.

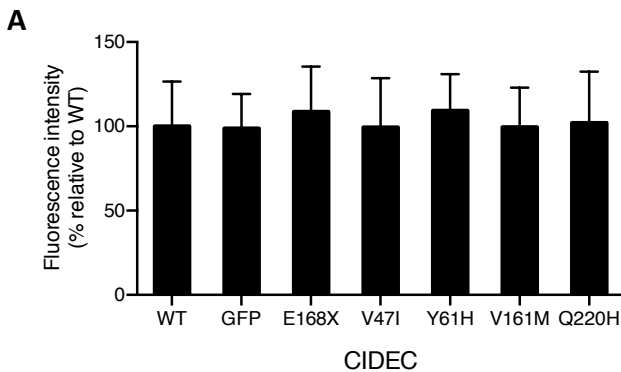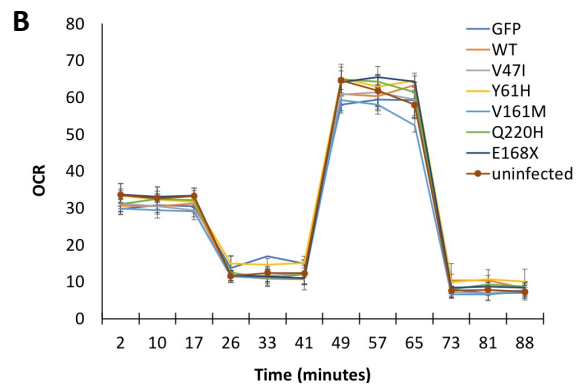

**S3 Fig: *CIDEC* rare variants do not affect mitochondria density or function.** Quantification of mitochondria density using MitoTracker in 3T3-L1 cells expressing *CIDEC* wild-type (WT) or each of the rare variants (A). Mitochondria function measured by Seahorse analyzer (OCR: Oxygen consumption rate) (B).

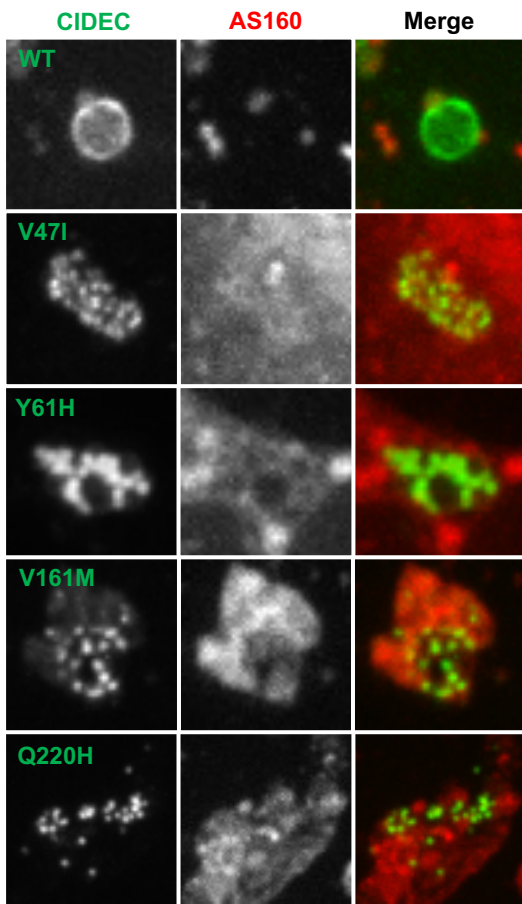

**S4 Fig:** Representative images of CIDEC wild-type (WT) or rare variants (green) and AS160 (red) in pre-adipocytes.

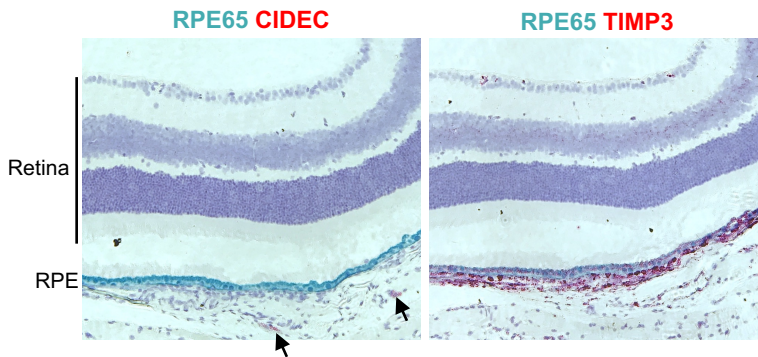

**S5 Fig:** By in situ hybridization (ISH), Cidec RNA is not detected in mouse retina and Retinal Pigment Epithelium (RPE) cells. Rare Cidec positive cells are present in the choroidal tissue underneath the RPE (left: red, arrows). ISH for Rpe65 was used as RPE cell marker, and ISH for Timp3 (right: red) was used as positive control.

| SNP         | LOCUS               | CHR | BP        | A1 | Q1 MAF | Q4 MAF | OR   | p value |
|-------------|---------------------|-----|-----------|----|--------|--------|------|---------|
| rs10033900  | <i>CFI</i>          | 4   | 109737911 | T  | 0.47   | 0.52   | 0.83 | 0.20    |
| rs10781182  | <i>MIR6130-RORB</i> | 9   | 74002804  | T  | 0.36   | 0.36   | 0.94 | 0.69    |
| rs10922109  | <i>CFH</i>          | 1   | 196735502 | A  | 0.26   | 0.23   | 1.10 | 0.47    |
| rs11080055  | <i>TMEM97-VTN</i>   | 17  | 28322698  | A  | 0.45   | 0.47   | 0.91 | 0.49    |
| rs114092250 | <i>PRLR-SPEF2</i>   | 5   | 35494346  | A  | 0.02   | 0.03   | 0.78 | 0.58    |
| rs1142      | <i>KMT2E-SRPK2</i>  | 7   | 105115879 | T  | 0.38   | 0.33   | 1.24 | 0.13    |
| rs12357257  | <i>ARHGAP21</i>     | 10  | 24710664  | A  | 0.20   | 0.29   | 0.63 | 0.004   |
| rs140647181 | <i>COL8A1</i>       | 3   | 99461824  | C  | 0.03   | 0.03   | 1.01 | 0.97    |
| rs1626340   | <i>TGFBR1</i>       | 9   | 99161090  | A  | 0.17   | 0.20   | 0.90 | 0.54    |
| rs2043085   | <i>LIPC</i>         | 15  | 58388755  | T  | 0.40   | 0.35   | 1.29 | 0.10    |
| rs2230199   | <i>C3</i>           | 19  | 6718376   | C  | 0.28   | 0.27   | 0.99 | 0.96    |
| rs3138141   | <i>RDH5-CD63</i>    | 12  | 55721994  | A  | 0.20   | 0.25   | 0.79 | 0.17    |
| rs3750846   | <i>ARMS2-HTRA1</i>  | 10  | 122456049 | C  | 0.41   | 0.41   | 1.05 | 0.71    |
| rs429358    | <i>APOE</i>         | 19  | 44908684  | C  | 0.09   | 0.11   | 0.89 | 0.62    |
| rs5754227   | <i>SYN3-TIMP3</i>   | 22  | 32709831  | C  | 0.10   | 0.10   | 1.03 | 0.89    |
| rs61941274  | <i>ACAD10</i>       | 12  | 111694806 | A  | 0.03   | 0.04   | 0.75 | 0.48    |
| rs61985136  | <i>RAD51B</i>       | 14  | 68302482  | C  | 0.34   | 0.36   | 0.94 | 0.68    |
| rs62247658  | <i>ADAMTS9-AS2</i>  | 3   | 64729479  | C  | 0.45   | 0.50   | 0.83 | 0.18    |
| rs67538026  | <i>CNN2</i>         | 19  | 1031439   | T  | 0.46   | 0.48   | 0.93 | 0.62    |
| rs72802342  | <i>CTRB2-CTRB1</i>  | 16  | 75200974  | A  | 0.07   | 0.06   | 1.34 | 0.32    |
| rs7803454   | <i>PILRB-PILRA</i>  | 7   | 100393925 | T  | 0.21   | 0.20   | 1.25 | 0.20    |
| rs8135665   | <i>SLC16A8</i>      | 22  | 38080269  | T  | 0.21   | 0.20   | 1.04 | 0.83    |
| rs943080    | <i>VEGFA</i>        | 6   | 43858890  | C  | 0.45   | 0.43   | 1.10 | 0.50    |
| rs9564692   | <i>B3GALT1</i>      | 13  | 31247103  | T  | 0.28   | 0.25   | 1.21 | 0.22    |

**S1 Table:** Comparison of AMD associated risk variants from Fritsche et. al, Nat Gen, 2015 in Q1 and Q4 AMD patients.

|                                   | Q1          | Q4          | p value | Missing (N%) |            |
|-----------------------------------|-------------|-------------|---------|--------------|------------|
|                                   |             |             |         | Q1           | Q4         |
| N                                 | 171         | 170         |         |              |            |
| Age, mean (sd)                    | 77.8 (7.9)  | 75.1 (8.1)  | 0.002   | 0 (0%)       | 0 (0%)     |
| Female, N (%)                     | 104 (60.1%) | 113 (66.5%) | 0.33    | 0 (0%)       | 0 (0%)     |
| Baseline visual acuity, mean (sd) | 42.0 (8.7)  | 74.2 (2.2)  | <2E-16  | 0 (0%)       | 0 (0%)     |
| Baseline CNV leakage area         | 7.6 (5.3)   | 6.1 (4.2)   | 0.05    | 104 (60.8%)  | 71 (71.7%) |

**S2 Table:** Quartile Q1 and quartile Q4 AMD TENAYA and LUCERNE patient demographic comparison.
